# Supplementary material for: Language proficiency, information accessibility, and healthcare service use: a qualitative case study of Nepali migrants in Finland
Source: Research Square preprint supplement (doi:10.21203/rs.3.rs-5218880/v1), 2025-01-21
Supplement: Supplementary file 1 [file 4ae02eef03c09c080063fdea.docx]

**Table 1 Participants’ characteristics**

| Characteristics                                                           N | |
| --- | --- |
| Gender |  |
| Man | 13 |
| Woman | 14 |
| Highest level of education* |  |
| Basic (up to 10 years) | 9 |
| Higher secondary (11-12 years) | 5 |
| University level (13+ years) | 13 |
| Age |  |
| 30-34 | 6 |
| 35-39 | 5 |
| 40-44 | 5 |
| 45-49 | 6 |
| 50+ | 5 |
| Profession |  |
| Entrepreneur | 4 |
| Restaurant chef | 5 |
| Health and social care sector | 5 |
| Other service sector | 9 |
| Others | 4 |
| Self-assessed Finnish skills |  |
| Poor | 13 |
| Medium or high | 14 |
| Self-assessed digital Skills |  |
| Poor | 12 |
| Medium | 9 |
| High | 6 |
| Number of years in Finland |  |
| 1-9 | 10 |
| 10-14 | 9 |
| 15-19 | 4 |
| 20+ | 4 |
| Reason for migration |  |
| Work | 9 |
| Family reunification | 12 |
| Study | 6 |

*This refers to the education completed in Nepal.
